1 ***Drosophila* p38 MAPK Interacts with BAG-3/starvin to Regulate Age-dependent**  
2 **Protein Homeostasis**

3

4 Sarah M. Ryan<sup>2,\*</sup>, Michael Almassey<sup>1,\*</sup>, Amelia M. Burch<sup>3</sup>, Gia Ngo<sup>2</sup>, Scott Barbee<sup>2</sup>,  
5 Nathan T. Mortimer<sup>1</sup>, Subhabrata Sanyal<sup>3,4</sup> and Alysia D. Vrailas-Mortimer<sup>1-3</sup>

6

7 1 Illinois State University, School of Biological Sciences, Normal, IL, USA

8 2 University of Denver, Department of Biological Sciences, Denver, CO, USA

9 3 Emory University, Department of Cell Biology, Atlanta, GA, USA

10 4 Calico, San Francisco, CA, USA

11

12

13

14

15

16

17

18

19

20

21

22

23

24

25

26

27 Running Title: p38K Regulates Age-Dependent Proteostasis

28

29 Key words/phrases: p38 MAPK, BAG-3/starvin, protein aggregation, aging, Lamin

30

31 Corresponding author:

32 Alysia D. Vrailas-Mortimer

33 Illinois State University

34 School of Biological Sciences

35 Science Laboratory Building

36 Normal, IL 61790

37 Phone: 309-348-8574

38 Fax: 309-348-3722

39 e-mail: admorti@ilstu.edu

40

41

42

43

44

45

46

47

48

49

50

51

52

## 53 **Summary**

54

55 As organisms age, they often accumulate protein aggregates that are thought to be  
56 toxic, potentially leading to age-related diseases. This accumulation of protein  
57 aggregates is partially attributed to a failure to maintain protein homeostasis. A variety of  
58 genetic factors have been linked to longevity, but how these factors also contribute to  
59 protein homeostasis is not completely understood. In order to understand the  
60 relationship between aging and protein aggregation, we tested how a gene that  
61 regulates lifespan and age-dependent locomotor behaviors, p38 MAPK (p38Kb),  
62 influences protein homeostasis as an organism ages. We find that p38Kb regulates age-  
63 dependent protein aggregation through an interaction with the Chaperone-Assisted  
64 Selective Autophagy complex. Furthermore, we have identified Lamin as an age-  
65 dependent target of p38Kb and the Chaperone-Assisted Selective Autophagy complex.

66

## 67 **Introduction**

68

69 Protein turnover is critical for maintaining tissue health as many proteins become  
70 damaged or misfolded during normal tissue functions. Therefore, the cell utilizes a  
71 variety of protein quality control mechanisms to refold or degrade these damaged  
72 proteins, including the ubiquitin proteasome system and macroautophagy. During aging,  
73 protein quality control mechanisms become less efficient leading to the accumulation of  
74 damaged or misfolded proteins that begin to form protein aggregates<sup>1</sup>. It has been  
75 hypothesized that these aggregates are toxic and may lead to the deleterious  
76 phenotypes associated with normal aging, such as impaired tissue function<sup>1</sup>.  
77 Furthermore, decreased protein aggregation has been associated with longevity. For  
78 example, over-expression of Foxo leads to an increased lifespan but also a concordant

79 decrease in protein aggregation in *C. elegans*, *Drosophila*, and mice <sup>2-6</sup>, suggesting that  
80 lifespan and protein aggregation are tightly linked processes. However, the molecular  
81 mechanisms that underlie the relationship between aging and protein homeostasis have  
82 not been fully characterized.

83

84 One pathway that has been linked to both aging and protein homeostasis is the  
85 stress response p38 MAPK (p38K) pathway. In mammals, there are four p38K genes ( $\alpha$ ,  
86  $\beta$ ,  $\gamma$ , and  $\delta$ ), and p38K $\alpha$  has been linked to both the inhibition <sup>7,8</sup> and induction <sup>9,10</sup> of  
87 macroautophagy, in particular in response to oxidative stress <sup>11,12</sup>. In addition, p38K $\alpha$   
88 has been linked to regulating macroautophagy in cellular senescence <sup>13-15</sup>. However,  
89 how p38K signaling may contribute to protein homeostasis in response to natural aging  
90 is not well understood. The fruit fly *Drosophila melanogaster* has two canonical p38K  
91 genes (p38Ka and p38Kb), and we have previously reported that p38Kb acts in the adult  
92 musculature to regulate aging. We found that over-expression of p38Kb leads to  
93 increased lifespan while loss of p38Kb results in a short lifespan and age-dependent  
94 locomotor behavior defects <sup>16</sup>. In addition, oxidatively damaged proteins accumulate in  
95 the muscle of p38Kb mutants with age <sup>16</sup>, and loss of p38Kb leads to increased  
96 polyubiquitination of insoluble proteins and alterations in oxidative stress dependent  
97 translation <sup>17</sup>, suggesting that these oxidatively damaged proteins may be aggregating in  
98 p38Kb mutants. Furthermore, p38Kb has been shown in a *Drosophila* cell culture system  
99 to pull down with the HspB8 homologue CG14207 <sup>18</sup>, which plays a role in the muscle by  
100 regulating protein homeostasis as a part of a protein quality control mechanism called  
101 BAG-3 Mediated Selective Autophagy pathway or the Chaperone-Assisted Selective  
102 Autophagy (CASA) complex in flies <sup>19,20</sup>. The CASA complex also includes the  
103 chaperone Hsc70 and the co-chaperone BAG-3 (starvin in flies). BAG-3/starvin binds to  
104 specific damaged or misfolded protein substrates and brings them to the CASA complex

105 where it binds to Hsc70 and HspB8. Those substrates that cannot be refolded by the  
106 complex are polyubiquitinated and targeted to the autophagosome through a handover  
107 between BAG-3/stv and the autophagy adaptor protein p62 (ref(2)p in flies), and  
108 subsequently degraded through the autophagosome-lysosome system<sup>21-25</sup>.

109

110 Here, we report that p38Kb regulates age-dependent muscle protein  
111 homeostasis through an interaction with the CASA complex. We find that p38Kb acts as  
112 an intermediary between BAG-3/starvin and p62/ref(2)p in targeting damaged or  
113 misfolded proteins for degradation. This interaction is not only important for maintaining  
114 protein homeostasis but also for lifespan extension. In addition, we find that the  
115 *Drosophila* homologue of the Hutchinson-Gilford progeria protein, Lamin A/C, is a target  
116 for p38Kb and CASA complex mediated protein turnover, suggesting that the p38Kb  
117 aging phenotypes may be a result of impaired Lamin degradation.

118

119

## 120 **Materials and Methods**

121

### 122 **Genotypes**

123 UAS-p38Kb wt, UAS-p38Kb Kinase Dead, p38Kb<sup>Δ45</sup>, p38Kb<sup>Ex41</sup>, w<sup>1118</sup>, Mef2-GAL4 and  
124 MHC-GAL4 were as described in<sup>16</sup>. The p38Kb<sup>Ex41</sup> is a precise excision allele and  
125 serves as a genetic background control for p38Kb<sup>Δ45</sup> deletion mutation.

126

127 UAS-stv RNAi 34408 (w<sup>1118</sup>; P{GD10796}v34408) and UAS-stv RNAi 34409 (w<sup>1118</sup>;  
128 P{GD10796}v34409/TM3) are described in<sup>26</sup> and are from the Vienna *Drosophila*  
129 Resource Center.

130

131 stv-GFP trap ( $w^{1118};$ ; Pbac{754.P.F3v30} stv<sup>+CPTI 002824</sup>), HspB8-GFP trap ( $w^{1118}$   
132 PBac{810.P.FSVS-2}CG14207<sup>CPTI004445</sup>), Hsc70-4 GFP trap ( $w^{1118}$  PBac{544.SVS-  
133 1}N<sup>CPTI002347</sup>) are from the Kyoto Stock Center.

134

135  $w^{1118}$ ; P{y[+mDint2] w[BR.E.BR]=SUPor-P}ref(2)P<sup>KG00926</sup>,  $w^{1118};$ +mDint2 EY4969 stvEP,  
136 Lam<sup>A25</sup> pr<sup>1</sup>, and  $w^{1118}$ ; P{w[+mC]=UAS-Lam.GFP}3-3 were obtained from the  
137 Bloomington Drosophila Stock Center.

138

139 All fly stocks were backcrossed into the  $w^{1118}$  background and isogenized for 10  
140 generations. All stocks were reared at 25°C in a 12hr:12hr light:dark cycle on standard  
141 fly food media.

142

### 143 Immunofluorescence

144 Adult flies were fixed in 4% paraformaldehyde for 48hrs at 4°C. Indirect flight muscles  
145 were dissected in 1X PBS, permeabilized in 1X PBS 0.15% Triton-X 100, and blocked in  
146 NGS + 0.15% Triton-X 100. Samples were incubated in primary antibody at 4°C  
147 overnight, washed in 1X PBS 0.15% Triton-X 100, and incubated in secondary antibody  
148 at room temperature for 2hrs. Samples were mounted in Vectashield mounting medium  
149 (Vectorlabs) and visualized using a laser scanning confocal microscope. Antibodies:  
150 rabbit anti-GFP 1:400 (Invitrogen), mouse anti-FLAG M2 1:1000 (Sigma), rabbit anti-stv  
151 1:1000 (gift of Jörg Höfeld), rat anti- $\alpha$  actinin 1:100 (Abcam), rabbit anti-ubiquitin  
152 linkage-specific K63 anti-mouse 1:200 (Abcam), IgG- Alexa Fluor 488 1:200 (Life  
153 Technologies), anti-mouse IgG- Alexa Fluor 568 1:500 (Life Technologies), anti-rabbit  
154 IgG- Alexa Fluor 488 1:500 (Life Technologies) and Rhodamine Phalloidin 1:2000.

155

### 156 Protein aggregate analysis

157 Indirect flight muscles were prepared as described above from 9 individual flies per  
158 genotype. Protein aggregates were identified using mouse anti-polyubiquitin 1:1000  
159 (Enzo Life Sciences). Three muscles from each individual fly were imaged as z-series  
160 and flattened into a single image as a max projection using confocal microscopy for a  
161 total of 27 muscles per genotype. Images were analyzed using Image J “Analyze  
162 Particles” function with a diameter of 100 pixels set for the minimum aggregate size.  
163 Aggregate number and size were analyzed using ANOVA followed by Tukey’s HSD  
164 using the R package “multcomp” to generate significance groups with each letter group  
165 being significantly different with a p value of  $\leq 0.05$ . Within genotype/across time point  
166 analyses were performed using the Welch two sample t-test in R.

167

### 168 **Lifespan**

169 For lifespan experiments using the UAS-p38Kb<sup>wt</sup>, ref(2)p -/+, p38Kb <sup>$\Delta 45/\Delta 45$</sup> , the stv EP  
170 (stv<sup>wt</sup>) lines, and their respective controls, virgin females were kept on standard  
171 molasses *Drosophila* media. Due to a change in lab food, the stv RNAi 34408 and stv  
172 RNAi 34409 lifespan experiments (with their respective controls) were performed on the  
173 standard Bloomington *Drosophila* media. Virgin flies were collected and reared at 25°C  
174 in a 12hour:12hour light:dark cycle. Flies were put on new food twice a week. The  
175 number of dead animals was scored daily. Lifespan was analyzed using a log rank test  
176 to compare genotypes with censored data on all genotypes and then on all pairwise  
177 comparisons using the R package “survival” with Benjamini and Hochberg correction  
178 (false discovery rate < 0.05).

179

### 180 **Co-immunoprecipitation**

181 Flies were aged 1 week or 5 weeks. Forty thoraxes per genotype per condition were  
182 homogenized in high salt buffer (0.5 M KCl, 35% glycerol, 10 mM HEPES pH 7.0, 5 mM

183 MgCl<sub>2</sub>, 0.5 mM EDTA pH 8.0, 0.1% NP40 25 mM NaF, 1 mM Na<sub>2</sub>VO<sub>4</sub>, 1 mM DTT,  
184 Complete protease inhibitor). The lysate was flash frozen in liquid nitrogen and quickly  
185 thawed at 37°C. Then lysates were rocked at 4°C for 30 minutes and centrifuged at  
186 14,200 x g for 30 minutes at 4°C. The supernatant was transferred to equilibrated beads  
187 anti-Flag (M2) agarose (Sigma) or anti-GFP agarose (Chromotek) and rocked for 2  
188 hours at 4°C. Beads were collected using a magnetic bar and washed four times with IP  
189 buffer (50 mM HEPES pH 7.0, 100 mM KCl, 0.4% NP40 1.5 mM MgCl<sub>2</sub>, 5% glycerol, 25  
190 mM Na, 1 mM Na<sub>2</sub>VO<sub>4</sub>, 1 mM EDTA, 1 mM DTT, Complete protease inhibitor). Lysates  
191 were then analyzed by immunoblotting using rabbit anti- GFP 1:1000 (Invitrogen),  
192 mouse anti-FLAG M2 1:1000 (Sigma), rabbit anti-phospho-p38 1:1000 (Cell Signaling  
193 Technologies), goat anti total p38 1:1000 (Santa Cruz Biotechnology), rabbit anti-stv  
194 1:10,000 (gift of Jrög Höhfeld) or mouse anti-Lamin 1:1000 (DHSB).

195

## 196 **Immunoblotting**

197 Wild type flies (*w<sup>1118</sup>*) were aged either for 3, 15, 30, and 45 days or for 1-5 weeks. Three  
198 thoraxes were dissected and homogenized in 1x Laemmli buffer. Immunoblots were  
199 performed as described in <sup>16</sup>. Membranes were developed using SuperSignal West  
200 Femto kit (ThermoFisher) or Pierce ECL (ThermoFisher) and exposed on  
201 autoradiography film. Antibodies used were: rabbit anti-GFP 1:1000 (Invitrogen), rabbit  
202 anti-starvin 1:10,000 (gift of Jrög Höhfeld), mouse anti-actin 1:5,000,000 (Sigma), mouse  
203 anti-FLAG M2 (Sigma), rabbit anti-alpha tubulin (Cell Signaling Technologies), mouse  
204 anti-Lamin 1:100 (DHSB), rabbit anti-phospho Lamin A Ser22 1:1000 (Thermofisher),  
205 mouse anti-beta tubulin (E-10) 1:5000 (Santa Cruz Biotechnology), mouse anti- HRP  
206 1:20,000 (Jackson Labs), rabbit anti-HRP 1:40,000 (Jackson Labs). Densitometry was  
207 performed using a minimum of three independent blots. For statistical analysis of protein



208 expression level, pixel density of the tested protein was normalized within sample to the  
209 loading control. These values were then normalized to control to calculate fold change.  
210 The fold change values were analyzed by Student's t-test or ANOVA <sup>27</sup> as appropriate.

211

## 212 **Sucrose Gradient Fractionation**

213 p38Kb<sup>Ex41/Ex41</sup> and p38Kb<sup>Δ45/Δ45</sup> flies were aged three weeks. 30 thoraxes per genotype  
214 were dissected and homogenized in NP40 lysis buffer. Samples were centrifuged at  
215 800xg for 10 minutes at 4°C. The supernatant was then transferred to a 15-50% sucrose  
216 discontinuous gradient. Samples were then ultracentrifuged at 55,000 rpm (201,000xg at  
217  $r_{av}$ ) for 20 hours at 4°C in a TLS-55 in a Beckman Coulter Optima TLX Ultracentrifuge.  
218 200 $\mu$ l fractions were collected and the pellet was resuspended in an equal volume of  
219 NP40 Lysis Buffer.

220

## 221 **Stv localization**

222 Immunohistochemistry on p38Kb<sup>Ex41/Ex41</sup> and p38Kb<sup>Δ45/Δ45</sup> Indirect flight muscles was  
223 performed as described above. Confocal images from five individual flies per genotype  
224 were analyzed for average pixel density using ImageJ in three different non-overlapping  
225 locations on each muscle for a total of 15 measurements per genotype. Average pixel  
226 density was analyzed by Student's t-test using R.

227

## 228 **Results**

229

### 230 **p38Kb regulates age-dependent protein homeostasis.**

231 p38Kb null mutant animals (p38Kb<sup>Δ45/Δ45</sup>, a deletion of the p38Kb gene) exhibit age-  
232 dependent locomotor behavior defects and have a 48% lifespan reduction. In addition,

233 biochemical analysis suggests that p38Kb null mutants have increased levels of  
234 insoluble polyubiquitinated proteins in the thoracic musculature of aged animals as  
235 observed by immunoblot analysis<sup>17</sup>. However, protein aggregate size and distribution  
236 have not been visualized in the p38Kb mutants, nor is it known whether augmenting  
237 p38Kb activity in muscles leads to a change in protein homeostasis. Therefore, we  
238 analyzed how p38Kb expression influences protein aggregation. We find that p38Kb null  
239 mutants have an increased number of protein aggregates in the adult indirect flight  
240 muscle at 1 week and 3 weeks of age (Figure 1A-B and E-F, Table S1) and increased  
241 aggregate size with age (Figure 1G-H, Table S1) as compared to a genetic background  
242 control (p38Kb<sup>Ex41/Ex41</sup>, a precise excision allele). Furthermore, transgenic inhibition of  
243 p38Kb in the muscle using a dominant negative kinase dead construct (p38Kb<sup>KD</sup>,<sup>16</sup>) also  
244 results in a significant increase in aggregate number, however aggregate size was not  
245 affected (Figure 1I-L and Table S2). Conversely, as both strong and moderate levels of  
246 p38Kb over-expression lead to an increased lifespan (37% and 14% extension,  
247 respectively)<sup>16</sup>, we tested if p38Kb over-expression also affects protein aggregation. We  
248 find that both strong over-expression of p38Kb in the adult muscle using the Mef2-GAL4  
249 driver (Figure 1C-D and M-P, Table S3) and moderate over-expression of p38Kb using  
250 the MHC-GAL4 driver (Figure 1Q-T and Table S4) leads to decreased protein aggregate  
251 number and size throughout the lifespan. It has been hypothesized that protein  
252 aggregate accumulation and increased size may be toxic, potentially explaining the  
253 decreased lifespan and age-dependent locomotor abnormalities in p38Kb<sup>Δ45</sup> null mutants  
254 and the increased longevity in the p38Kb over-expression animals.

255

### 256 **p38Kb mediates age-dependent phenotypes through autophagy**

257 In order to determine what mechanism plays a role in the clearance of polyubiquitinated  
258 protein aggregates, we first tested what type of ubiquitin linkage is present in the

259 aggregates in wild type flies. In particular, K63-linked ubiquitination has been shown to  
260 facilitate the formation of aggregates<sup>28–30</sup> that are cleared through autophagy<sup>30–32</sup>. We  
261 find that a subset of aggregates from aging flies contain K63-linked ubiquitinated  
262 proteins (Figure 2A-C), suggesting that these muscle protein aggregates are degraded  
263 through autophagy. Polyubiquitinated protein aggregates can be degraded through  
264 selective autophagy in which the adaptor protein p62 (*ref(2)p* in flies) promotes the  
265 packaging and delivery of polyubiquitinated proteins to the autophagosome<sup>33</sup>. If p38Kb  
266 requires selective autophagy to mediate protein homeostasis, then loss of *ref(2)p* will  
267 block the p38Kb mediated decreased aggregation phenotype. We find that loss of a  
268 single copy of *ref(2)p* results in fewer aggregates (Figure 2D-E and Table S5), which  
269 may reflect compensation by other protein clearance mechanisms with aging, especially  
270 as homozygous *ref(2)p* mutants are viable. When a single copy of *ref(2)p* is removed in  
271 the p38Kb over-expression background, this prevents the reduced protein aggregation  
272 observed in the p38Kb over-expression animals at both young and old ages (Figure 2D-  
273 E and Table S5). This dominant interaction suggests that *ref(2)p* acts downstream of  
274 p38Kb to promote the degradation of protein aggregates.

275

### 276 **p38Kb colocalizes with the CASA complex in the adult flight muscle.**

277 In order to better understand the role of p38Kb in protein homeostasis, we first  
278 determined where in the muscle p38Kb localizes and find that a FLAG-tagged p38Kb  
279 (green) colocalizes with the Z-disc marker alpha-actinin and is also present at the M-line  
280 (Figure 2F). The muscle Z-disc is an area of high protein turnover, and one protein  
281 quality control mechanism that localizes to the Z-disc in mice and adult flies is the  
282 Chaperone-Assisted Selective Autophagy (CASA) complex<sup>19,34</sup>. In adult *Drosophila*  
283 muscle, the CASA complex has been reported to consist of the Hsc70 homologue,  
284 Hsc70-4, the HspB8 homologue CG14207 and the BAG-3 homologue starvin (*stv*)<sup>19</sup>.

285 We find that p38Kb colocalizes with all the CASA complex members at the Z-disc and  
286 M-line (Figure 2G-I).

287

288 **p38Kb physically interacts with the CASA complex in the adult flight muscle.**

289 In order to further determine if p38Kb physically interacts with the CASA complex in the  
290 adult muscle, we performed co-immunoprecipitation experiments. In *Drosophila* cell  
291 culture p38Kb<sup>wt</sup> was shown to co-immunoprecipitate with the HspB8 homologue  
292 CG14207<sup>18</sup>, therefore, we tested if this interaction also occurs in adult indirect flight  
293 muscle. As the interaction between p38Kb and its targets may be transient, we utilized a  
294 FLAG-tagged p38Kb kinase dead construct (UAS-p38Kb<sup>KD</sup> Mef2-GAL4) that is able to  
295 be activated and bind to a target but cannot phosphorylate it, leading to a delayed  
296 release of the target<sup>35</sup>. We expressed p38Kb<sup>KD</sup> in the adult flight muscle of a fly that also  
297 endogenously expressed GFP tagged HspB8, in which GFP is spliced in as a new exon  
298 of the endogenous gene. This results in a GFP fusion protein that is expressed in the  
299 same pattern as endogenous HspB8 (<sup>19</sup> and Figure 2H'). We find that p38Kb<sup>KD</sup> was able  
300 to pull down HspB8 (Figure 2J) as compared to the HspB8-GFP control background. In  
301 addition, expression of p38Kb<sup>KD</sup> in a wildtype background was able to pull down un-  
302 tagged endogenous stv (Figure 2K). We then performed reverse IPs in which we  
303 immunoprecipitated each endogenously GFP tagged CASA complex protein (Hsc70-4,  
304 HspB8, or stv) and probed for FLAG tagged p38Kb<sup>KD</sup> and found that p38Kb co-  
305 immunoprecipitates with the CASA complex (Figure 2L-N) with stronger binding at  
306 younger ages than older ages. Interestingly, we found no significant difference in the  
307 expression levels of Hsc70-GFP, stv-GFP, and over-expression of p38Kb<sup>KD</sup> with age  
308 (Figure S1A-B, D) while levels of HspB8-GFP increased with age (Figure S1C). These  
309 data suggest that the age-dependent interaction between p38Kb and the CASA complex

310 may be due to changes in the physical interactions between these proteins rather than a  
311 reduction in protein levels.

312 To verify that endogenous p38Kb can interact with the CASA complex, we  
313 performed co-immunoprecipitations with muscle lysates from flies expressing either  
314 endogenously GFP tagged Hsc70-4, HspB8 or *stv* in a wild type background and probed  
315 for endogenous activated p38K that is dual phosphorylated on the TGY motif. We find  
316 that all three members of the CASA can co-immunoprecipitate with endogenous  
317 phosphorylated p38K in the muscle (Figure 2O). These results suggest that p38Kb is  
318 able to physically interact with the CASA complex.

319

### 320 **p38Kb acts downstream of the CASA complex.**

321 As p38Kb physically interacts with the CASA complex, we next tested if p38Kb is  
322 acting upstream activity of the complex to promote the initial recognition of misfolded  
323 proteins or the downstream activity of the complex to direct un-foldable proteins to the  
324 autophagosome. As BAG-3/*stv* provides both the specificity to the CASA complex and is  
325 involved in the handoff of damaged proteins to p62/ref(2)p for autosomal degradation<sup>21-</sup>  
326<sup>25</sup>, we tested for genetic interactions between p38Kb and *stv*. *stv* null mutants have  
327 impaired locomotor functions, muscle degeneration and early lethality<sup>19,36</sup>. Due to the  
328 severity of these null phenotypes, we utilized *stv* RNAi lines to generate an allelic series  
329 of *stv* loss of function in the muscle. We find that weak inhibition of *stv* (UAS-*stv*  
330 RNAi<sup>34408</sup> MHC-GAL4) had no effect on protein aggregation (Table S6). However,  
331 moderate inhibition of *stv* (UAS-*stv* RNAi<sup>34409</sup> MHC-GAL4) results in increased protein  
332 aggregate number and size (Figure 3A-B and Table S7) and results in a decrease in  
333 lifespan particularly in the first half of life as compared to outcrossed controls (Figure 3C  
334 and Table S8). Strong inhibition of *stv* (UAS-*stv* RNAi<sup>34408</sup> Mef2-GAL4) leads to a  
335 severely reduced lifespan of ~4 days on average (Figure 3D and Table S9).

336 If p38Kb acts to regulate the downstream activity of the CASA complex, then over-  
337 expression of p38Kb should rescue these *stv* RNAi phenotypes. We find that over-  
338 expression of p38Kb rescues both protein aggregate number and size in the *stv*  
339 moderate inhibition background (Figure 3A-B and Table S7) and also rescues the  
340 lifespan defect (Figure 3C and Table S9). Furthermore, p38Kb over-expression is able to  
341 partially rescue the decreased lifespan exhibited by strong *stv* inhibition increasing  
342 average lifespan from 4 days to 13 days (Figure 3D and Table S10). To further test if  
343 p38Kb acts downstream of the CASA complex, we combined loss of p38Kb with CASA  
344 complex over-expression. If p38Kb acts downstream of the CASA complex, then over-  
345 expression of the CASA complex members in the p38Kb mutant background will not be  
346 able to rescue the p38Kb mutant phenotypes. We find that over-expression of *stv* in the  
347 p38Kb mutants not only fails to rescue the p38Kb mediated short lifespan defect but  
348 reduces the lifespan further (Figure 3E and Table S11). This is particularly striking as  
349 over-expression of *stv* in a wild type background does not significantly affect lifespan  
350 (Figure 4H and Table S12) as compared to the outcrossed transgene control ( $p$  value =  
351 0.195). This suggests that p38Kb may be a limiting factor in regulating the downstream  
352 activity of the CASA complex in which it hands the poly-ubiquitinated misfolded proteins  
353 to ref(2)p for degradation through the autophagosome.

354

### 355 **p38Kb regulates the activity of the CASA complex in protein homeostasis.**

356 If p38Kb is a limiting factor for *stv* function, then the combined over-expression of  
357 p38Kb and *stv* may result in a further beneficial effect. We find that over-expression of  
358 *stv* alone results in fewer aggregates at young and old ages (Figure 4A-B and Table  
359 S13) and smaller aggregates with age (Figure 4D and Table S13) as compared to  
360 outcrossed controls. However, co-over-expression of p38Kb and *stv* does not result in a  
361 further reduction in aggregate number as compared to over-expression of p38Kb or *stv*

362 alone (Figure 4A and Table S13). By 5 weeks of age, co-over-expression of p38Kb and  
363 stv flies have comparable aggregate number to controls (Figure 4B and Table S13).  
364 Conversely, p38Kb and stv co-over-expression results in a reduction in aggregate size at  
365 a young age compared to over-expression of stv alone (Figure 4C and Table S13, p  
366 value < 0.001), suggesting that p38Kb is a limiting factor for stv function in regulating  
367 aggregate size. Unlike with aggregate number, the aggregates remain significantly  
368 smaller in size as the flies age in the combined over-expression background (Figure 4D  
369 and Table S13). We also find that co-over-expression of p38Kb and stv leads to an  
370 additional 5% increase in lifespan relative to p38Kb over-expression alone (Figure 4H  
371 and Table S12). Interestingly, the co-over-expression animals show a very similar  
372 lifespan to the p38Kb over-expression alone animals until ~day 50, when the p38Kb  
373 alone animals begin to die at a faster rate (Figure 4H). One explanation is that co-over-  
374 expression of p38Kb and stv provides beneficial effects in early adulthood that continue  
375 throughout adulthood leading to increased lifespan despite the presence of protein  
376 aggregates. Another possibility is that aggregate size is a reflection of aggregate  
377 content. If the CASA complex can only target a subset of proteins for refolding or  
378 degradation, then increasing CASA complex activity could lead to smaller aggregates as  
379 the CASA targets are effectively degraded through an interaction with p38Kb and ref(2)p  
380 rather than aggregating. Therefore, size and/or content may play a more important role  
381 in determining lifespan as compared to overall aggregate number.

382

### 383 **p38Kb is required for proper localization of stv in the muscle.**

384 Since we find that p38Kb acts between stv and ref(2)p in regulating protein  
385 aggregation, we hypothesize that p38Kb plays a role in stabilizing the transfer of  
386 misfolded proteins primed for degradation from the CASA complex to ref(2)p. If so, then  
387 over-expression of p38Kb would lead to increased efficiency in targeting misfolded

388 proteins to the autophagosome (Figure 1M-T), and inhibition of p38Kb would lead to an  
389 increase in protein aggregation (Figure 1E-L). In addition, loss of p38Kb may lead to a  
390 failure of stv to maintain its interaction with the CASA complex or to interact with ref(2)p.  
391 Therefore, we tested if stv is still able to localize to the Z-disc in the absence of p38Kb.  
392 We find that in p38Kb null mutants, stv is more diffuse throughout the muscle but is still  
393 able to localize to the Z-disc and M-line in (Figure 4E-G), suggesting that its localization  
394 is partially impaired in the absence of p38Kb. Furthermore, we find that the localization  
395 of the CASA complex member HspB8 in the muscle is unaffected by loss of p38Kb  
396 (Figure S2). These data indicate that p38Kb may play a role in stabilizing the interaction  
397 between the CASA complex and stv that allows stv to direct misfolded proteins to  
398 ref(2)p.

399

#### 400 **Lamin protein binds to the CASA complex and accumulates in stv RNAi and** 401 **p38Kb mutants.**

402 In order to determine if p38Kb might be playing a role in the targeting of  
403 misfolded proteins from stv to ref(2)p, we first needed to identify a protein target of both  
404 stv and p38Kb. Therefore, we focused on proteins associated with Limb-Griddle  
405 Muscular Dystrophy (LGMD), which is caused by mutations in either BAG-3 (stv) or  
406 HspB8<sup>37-39</sup>. In addition, p38K signaling has been implicated in LGMD<sup>40-42</sup>. *Drosophila*  
407 have 19 orthologues of LGMD proteins, one of which is Lamin A/C (Lamin or Lamin Dm0  
408 in flies). Lamin is of particular interest since mutations in Lamin A/C also result in the  
409 accelerated aging disorder Hutchinson-Gilford progeria<sup>43-45</sup>, and Lamin has been shown  
410 to aggregate under oxidative stress conditions<sup>46</sup>. Mutations in Lamin A/C are also  
411 sufficient to induce Lamin aggregation and abnormal nuclear morphology in human cell  
412 culture, *C. elegans*, and *Drosophila* systems<sup>44,47-54</sup>. Furthermore in *Drosophila*, Lamin



413 knockouts have similar phenotypes to p38Kb and/or stv mutants, such as reduced  
414 locomotor function and increased activity of the Nrf-2/Keap-1 pathway<sup>49,55,56</sup>.

415         If Lamin is a target of the CASA complex, then decreased activity of the CASA  
416 complex should result in an accumulation of Lamin protein. We find that Lamin levels do  
417 not change with age (Figure 5A), however, inhibition of stv results in a significant  
418 increase in the total amount of Lamin protein regardless of age (Figure 5A-B, p value  
419 0.028). Interestingly, loss of p38Kb leads to an age-dependent increase in Lamin protein  
420 as compared to age matched controls (Figure 5C-D, p value = 0.006643). As the  
421 association between p38Kb and the CASA seems to decline with age (Figure 2L-N),  
422 these data suggest that p38Kb activity later in life is important for maintaining protein  
423 homeostasis and lifespan.

424         To investigate if Lamin is accumulating in the protein aggregates, we performed  
425 fractionation experiments in which we find that Lamin is predominantly found in fractions  
426 5-7 in controls with the majority concentrated in fraction 6 (Figure 5E). Interestingly, we  
427 also find a high molecular weight form of Lamin mainly restricted to fraction 5 (Figure  
428 5E). In addition, we also observe that both the main and high molecular weight Lamin  
429 species are in the aggregate containing pellet (Figure 5E). We next tested how loss of  
430 p38Kb affects the aggregation of Lamin and find that p38Kb mutants have decreased  
431 Lamin in fractions 5-7 with a concurrent increase of both the main and high molecular  
432 weight species of Lamin in the pellet (Figure 5E). This suggests that Lamin is a target of  
433 p38Kb and that loss of p38Kb results in increased aggregation of Lamin.

434

435         Of interest is this high molecular weight form of Lamin, which is present in  
436 fraction 5 and the aggregates (Figure 5E). One important protein domain in Lamin is the  
437 CaaX box, which is farnesylated and required for Lamin localization to the inner nuclear  
438 membrane<sup>57-60</sup>. To test if this might be a farnesylated form of Lamin, we utilized the

439 Lam<sup>A25</sup> mutant which has a frameshift that results in the loss of the C-terminal CaaX  
440 box<sup>61</sup>. We find that the high molecular weight form of Lamin is lost in the Lam<sup>A25</sup> mutant  
441 whereas the predominant 75kDa band of Lamin is still present (Figure 5F). These data  
442 suggest that the high molecular weight Lamin we observe is the farnesylated form.

443

444 In addition to farnesylation, Lamin can also be phosphorylated by a variety of  
445 kinases that can change the solubility of Lamin<sup>54,62</sup>. For example, in a *Drosophila* cell  
446 culture system, a phospho-mimic mutation at Ser45 (the equivalent of Ser22 in humans)  
447 results in Lamin aggregation in both the nucleus and cytoplasm<sup>54</sup>. This serine residue is  
448 phosphorylated by the cd2 kinase<sup>63</sup>, but also happens to be a potential p38K  
449 phosphorylation site. Therefore, we tested if the levels of phospho- Ser45 Lamin are  
450 altered in p38Kb mutants. We find that phospho-Lamin levels are not significantly altered  
451 in the p38Kb mutants (Figure 5G-H p=0.09), suggesting that p38Kb is not required for  
452 Ser45 phosphorylation. We next examined if phosphorylated Lamin is also present in the  
453 aggregates. We find that in controls, phosphorylated Lamin is present in fractions 5-7  
454 with low amounts in the pellet (Figure 5I). We also observe a low molecular weight  
455 phospho-Lamin form that appears in the pellet (Figure 5I). In the p38Kb mutants,  
456 phospho-Lamin expression is reduced in fractions 6 and 7 and accumulates in the pellet  
457 (Figure 5I). Furthermore, increasingly smaller low molecular weight species of phospho-  
458 Lamin are present in the p38Kb<sup>Δ45</sup> mutants including the pellet (Figure 5I), suggesting  
459 that loss of p38Kb prevents the effective clearance of these Lamin cleavage forms.  
460 Interestingly, loss of the Lamin CaaX box does not affect these lower molecular weight  
461 forms, however, it does result in an increase in the phosphorylation of full-length Lamin  
462 (Figure 5F). Additionally, we do not detect phosphorylation positive high molecular  
463 weight forms of Lamin (Figure 5F), suggesting that farnesylated lamin is not  
464 phosphorylated at Ser45. These data combined with our finding that full length Lamin is

465 phosphorylated, suggest that when Lamin is unphosphorylated it is prone to  
466 farnesylation that may lead to aggregation.

467

468 To determine if Lamin is a direct target of p38Kb and the CASA complex, we  
469 tested if Lamin can bind to the CASA complex. We immunoprecipitated endogenously  
470 GFP tagged HspB8, Hsc70-4 and stv from adult *Drosophila* muscle and probed for  
471 endogenous Lamin. We find that full-length Lamin co-immunoprecipitates with all three  
472 members of the CASA complex (Figure 6A), but do not detect binding with either the  
473 higher or lower molecular weight forms of Lamin found in the fractions (Figure 5E and I).  
474 Furthermore, we expressed either a nuclear localization signal tagged GFP or Lamin  
475 tagged with GFP in the muscle and found that endogenous stv co-immunoprecipitates  
476 with Lamin (Figure 6B). These data suggest that the CASA complex is able to bind to  
477 misfolded forms of full-length Lamin for targeting to the autophagosome.

478

479 As we hypothesize that p38Kb is interacting with the CASA complex at the point  
480 in which the misfolded targets are handed over to ref(2)p for degradation, we tested if  
481 p38Kb also binds to Lamin. We find that p38Kb<sup>KD</sup> expressed in the muscle co-  
482 immunoprecipitates with both high and low molecular weight forms of Lamin (Figure 6C).  
483 Interestingly, p38Kb physically interacts with the aggregate prone low molecular weight  
484 species of Lamin as opposed to the predominant full-length form of Lamin (Figure 6C).  
485 More striking is that p38Kb<sup>KD</sup> physically interacts with increasingly larger forms of Lamin  
486 (Figure 6C), suggesting that p38Kb is interacting with the poly-ubiquitinated forms of  
487 Lamin.

488

489 We have developed a model in which misfolded proteins are targeted by stv to  
490 the CASA complex. Those proteins that cannot be refolded are then tagged with poly-

491 ubiquitin. These poly-ubiquitinated proteins are handed off to ref(2)p in a process  
492 mediated by p38Kb. This model predicts that in p38Kb mutants these poly-ubiquitinated  
493 proteins accumulate and then form aggregates. It additionally predicts that over-  
494 expression of p38Kb would lead to increased efficiency of the poly-ubiquitinated proteins  
495 being targeted to the autophagosome. This model would also predict that misfolded full-  
496 length Lamin would bind to the CASA complex for refolding. If Lamin cannot be refolded  
497 it is then poly-ubiquitinated and transferred to ref(2)p through an interaction with p38Kb.

498

## 499 **Discussion**

500 We find that the aging gene p38Kb regulates age-dependent protein homeostasis  
501 through an interaction with the CASA complex and is acting at a step between the poly-  
502 ubiquitination of a un-foldable target and its transfer to ref(2)p for autolysosomal  
503 mediated degradation. Interestingly, we find that p38Kb is important for the proper  
504 localization of stv to the Z-disc but does not affect the localization of other complex  
505 members. This suggests that p38Kb may play a role in maintaining the interaction  
506 between stv and the CASA complex which may be necessary for target transfer to  
507 ref(2)p. stv has a conserved MAPK docking site as well several potential conserved  
508 p38K phosphorylation sites. Furthermore, mammalian p62 has been shown to bind to  
509 p38Kb in vitro through two domains<sup>64</sup>, which are partially conserved in flies. Therefore,  
510 one possibility is that p38Kb mediated phosphorylation of stv facilitates the localization of  
511 a functional CASA complex to the Z-disc, where damaged proteins are rapidly turned  
512 over. Another possibility is that p38Kb binds to stv and ref(2)p and that the  
513 phosphorylation of stv is required for target hand-over to ref(2)p so that in the absence of  
514 p38Kb, stv cannot transfer targets to ref(2)p. A consequence of this may be that stv and  
515 the protein target together are released from the CASA complex, leading to  
516 mislocalization of stv. As we don't detect a decrease in phospho-Lamin in the p38Kb

517 mutants or find that the p38Kb can pull-down phospho-Lamin, it is unlikely that p38Kb is  
518 directly phosphorylating the target proteins as a part of the stv-ref(2)p hand-over  
519 process.

520

521         How protein aggregation contributes to aging and disease has been an area of  
522 great interest. One outstanding question is if protein aggregation is a consequence or  
523 cause of aging. It has been hypothesized that protein aggregates accumulate with age  
524 as the amount of damaged or misfolded proteins increase. However, it is not clear  
525 whether or not these aggregating proteins are toxic leading to tissue dysfunction and a  
526 disease state. Previous studies have found that long-lived fly strains such as over-  
527 expression of Foxo or parkin result in reduced protein aggregate formation<sup>4,65</sup>.  
528 Therefore, we hypothesized that decreased protein aggregation would lead to improved  
529 measures of healthspan, while increased protein aggregation would lead to reduced  
530 measures of healthspan. As expected, we find that the short-lived p38Kb mutants, which  
531 exhibit premature locomotor behavior defects<sup>16</sup>, have large and numerous protein  
532 aggregates. Similarly, inhibition of stv results in increased aggregation and decreased  
533 lifespan. We also find that over-expression of p38Kb leads to decreased protein  
534 aggregation and increased lifespan. However, over-expression of stv leads to decreased  
535 aggregate number but does not extend lifespan. One possibility is that decreasing  
536 aggregation alone is not sufficient to promote lifespan extension. Another possibility is  
537 that aggregate number is not as critical as aggregate size and/or content, particularly  
538 early in life, for lifespan extension. We find that stv over-expression only results in  
539 decreased aggregate size in older animals, however, co-over-expression of p38Kb and  
540 stv leads to reduced aggregate size at a young and old ages and leads to a further  
541 increase in lifespan. Thus, the turnover of specific toxic protein or subset of proteins  
542 early in life may lead to a reduction in the exposure to these toxic species and a lifespan

543 extension. We find that Lamin, which is mutated to an aggregation prone protein form in  
544 Hutchinson-Gilford progeria <sup>44,53,62,66</sup>, is a target of p38Kb and the CASA complex.  
545 Interestingly, p38Kb and Lamin mutants share similar phenotypes such as age-  
546 dependent locomotor impairments <sup>16,55,56</sup> and upregulation of the Nrf-2/Keap-1 pathway  
547 <sup>16,49</sup>. As loss of p38Kb leads to an accumulation of Lamin in the aggregates, this may be  
548 toxic to the cell, leading to impaired locomotor function, increased stress and decreased  
549 lifespan. Thus, we have found that one aging gene (p38Kb) regulates a second,  
550 unrelated aging gene (Lamin) via the CASA complex. These data suggest a new link  
551 between aging pathways and how they may converge through the regulation of protein  
552 homeostasis.

553

#### 554 **Acknowledgements**

555 We would also like to acknowledge the Bloomington Drosophila Stock Center (NIH  
556 P40OD018537), the Vienna Drosophila Resource Center, and Kyoto Stock Center for  
557 providing fly stocks used in this study. A. Vrailas-Mortimer was funded by start-up funds  
558 from the University of Denver, a Knoebel Center for the Study of Aging pilot grant, start-  
559 up funds from Illinois State University and was supported by the National Institute of  
560 Arthritis and Musculoskeletal and Skin Diseases of the National Institutes of Health  
561 under Award Number R15AR070505. The content is solely the responsibility of the  
562 authors and does not necessarily represent the official views of the National Institutes of  
563 Health. S. Sanyal was funded by startup funds from Emory University. S. Ryan was  
564 supported by a Knoebel Center for the Study of Aging pilot grant to A. Vrailas-Mortimer  
565 and S. Barbee. N. Mortimer was funded by start-up funds from Illinois State University.  
566 The funders had no role in study design, data collection and analysis, decision to  
567 publish, or preparation of the manuscript.

568

569

570 **Figure Legends**

571

572 **Fig 1. p38Kb regulates age-dependent protein homeostasis.**

573 Confocal micrographs of polyubiquitin positive protein aggregates in the adult indirect  
574 flight muscle in **A)** a precise excision genetic background control p38Kb<sup>Ex41/Ex41</sup> and **B)**  
575 p38Kb<sup>Δ45/Δ45</sup> null mutants at three weeks of age and in **C)** outcrossed Mef2-GAL4  
576 controls (Mef2>w<sup>11118</sup>) and **D)** UAS-p38Kb<sup>wt</sup> Mef2-GAL4 (Mef2>p38Kb<sup>wt</sup>) over-expression  
577 animals at 5 weeks of age. Scale bar equals 6.2 μm. Box-Whisker plots of aggregate  
578 number in p38Kb<sup>Δ45/Δ45</sup> mutants as compared to p38Kb<sup>Ex41/Ex41</sup> controls at **E)** 1 week and  
579 **F)** 3 weeks of age and aggregate size at **G)** 1 week and **H)** 3 weeks of age. Aggregate  
580 number in p38Kb<sup>KD</sup> Mef2-GAL4 (Mef2>p38Kb<sup>KD</sup>) and outcrossed Mef2-GAL4 controls at  
581 **I)** 1 week and **J)** 5 weeks of age and aggregate size at **K)** 1 week and **L)** 5 weeks of  
582 age. Aggregate number in strong p38Kb over-expression animals and outcrossed Mef2-  
583 GAL4 controls at **M)** 1 week and **N)** 5 weeks of age and aggregate size at **O)** 1 week  
584 and **P)** 5 weeks of age. Aggregate number in moderate p38Kb over-expression  
585 (MHC>p38Kb<sup>wt</sup>) animals and outcrossed MHC-GAL4 controls (MHC>w<sup>11118</sup>) at **Q)** 1 week  
586 and **R)** 5 weeks of age and aggregate size at **S)** 1 week and **T)** 5 weeks of age.

587

588 **Fig 2. p38Kb regulates aging phenotypes through ref(2)p.**

589 **A-C)** A subset of polyubiquitinated protein aggregates (green) in 3 week old  
590 p38Kb<sup>Ex4/Ex41</sup> control muscle contain K63 ubiquitinated (magenta) proteins (white  
591 arrows). **D-E)** Protein aggregate number in ref(2)p heterozygous mutant backgrounds at  
592 **D)** 1 week and **E)** 5 weeks. Loss of a single copy of ref(2)p prevents the p38Kb mediated  
593 reduced protein aggregation at 1 week and 5 weeks of age. Asterisks denote a p-value  
594 of ≤0.001. **(F-I)** Localization of a FLAG-tagged p38Kb (green in **F-I** and **F''-I''**) in the

595 adult indirect flight muscle. **F)** FLAG-tagged p38Kb localizes to the Z-disc (arrows) as  
596 exhibited by colocalization with the Z-disc protein alpha-actinin (magenta, **F'** and **F''**), as  
597 well as the M-line (arrowheads). **G-I)** p38Kb colocalizes with each CASA complex  
598 member (magenta, **G'-I'**) at the Z-disc. Over-expression of a FLAG tagged p38Kb in the  
599 muscle in **G)** an endogenous Hsc70-GFP fusion protein background, **H)** an endogenous  
600 HspB8-GFP fusion protein background, and **I)** a wildtype background with endogenous  
601 levels of stv. **J-K)** Muscle lysates expressing control and Mef2-GAL4 UAS-p38Kb<sup>KD-FLAG</sup>  
602 in either **J)** an endogenously expressed HspB8-GFP background or **K)** a wildtype  
603 background were immunoprecipitated using anti-FLAG coated beads. **J)** Immunoblots  
604 were probed with anti-GFP to detect the presence of HspB8 in the IP lysates or with **K)**  
605 anti-stv to detect the presence of stv in the IP lysates. **L-N)** Muscle lysates expressing  
606 p38Kb<sup>KD-FLAG</sup> in an endogenously expressed **L)** Hsc70-GFP, **M)** HspB8-GFP and **N)** stv-  
607 GFP background were immunoprecipitated using anti-GFP coated beads. Immunoblots  
608 were probed with anti-FLAG to detect the presence of p38Kb in the IP lysates. Note: stv  
609 is tagged with both GFP and FLAG. **O)** Endogenous phospho-p38 co-  
610 immunoprecipitates with Hsc70-4-GFP, HspB8-GFP, and stv-GFP. Muscle lysates were  
611 immunoprecipitated with anti-GFP beads, and immunoblots were probed with anti-  
612 phospho-p38K.

613

614 **Fig 3. p38Kb genetically interacts with stv to regulate protein homeostasis and**  
615 **lifespan. A)** Protein aggregate number and **B)** size in the moderate stv knockdown  
616 background using MHC-GAL4 at 5 weeks. Asterisks denote a p-value of  $\leq 0.001$ . **C)**  
617 Moderate over-expression of p38Kb (red line) results in an increased lifespan as  
618 compared to the MHC-GAL4 controls and p38Kb transgene control (black line and gray  
619 lines, respectively). Moderate knockdown of stv using the MHC-GAL4 results in a  
620 decreased lifespan (pink line compared to yellow and black lines) and is rescued by



621 p38Kb over-expression (compare pink line to blue line). **D)** Strong over-expression of  
622 p38Kb (red line) results in an increased lifespan as compared to the Mef2-GAL4 controls  
623 and p38Kb transgene control (black line and gray lines, respectively). Strong knockdown  
624 of stv using the Mef2-GAL4 results in a decreased lifespan (pink line compared to yellow  
625 and black lines) and is partially rescued by p38Kb over-expression (compare pink line to  
626 blue line). **E)** Over-expression of stv in the p38Kb mutant background results in a further  
627 reduction of lifespan as compared to p38Kb mutant controls (compare blue line to red  
628 and grey lines).

629

630 **Fig 4. p38Kb is limiting for stv function and localization.**

631 Protein aggregate number at **A)** 1 week and **B)** 5 weeks and protein aggregate size at  
632 **C)** 1 week and **D)** 5 weeks measured in stv over-expression backgrounds. Over-  
633 expression of stv leads to reduced aggregate number at 1 and 5 weeks and aggregate  
634 size at 5 weeks. Co-over-expression of stv and p38Kb does not result in a further  
635 decrease in protein aggregate number but trends towards decreased aggregate size at  
636 both 1 and 5 weeks of age. Asterisks denote a p-value of  $\leq 0.001$  when compared to the  
637 GAL4 control. **E)** stv localizes to the adult muscle Z-disc and M-line (white arrows) in  
638 control animals. **F)** stv localization is disrupted in p38Kb mutants. **G)** Quantification of  
639 average pixel density. **H)** Over-expression of stv alone has no significant effect on  
640 lifespan (pink line as compared to yellow and black lines), however, co-over-expression  
641 of stv and p38Kb results in a further increase in lifespan (compare red line to blue line).

642

643

644 **Fig 5. p38Kb and stv regulate Lamin aggregation.**

645 **A)** Immunoblot analysis of stv-RNAi and GAL4 controls flies muscle lysates probed with  
646 anti-Lamin and **B)** quantified using densitometry. **C)** Immunoblot analysis of

647 p38Kb<sup>Ex41/Ex41</sup> control and p38Kb<sup>Δ45/Δ45</sup> mutant muscle lysates probed with anti-Lamin  
648 and **D)** quantified using densitometry. **H)** Immunoblots of sucrose gradient fractions  
649 from 3 week old p38Kb<sup>Ex41/Ex41</sup> control and p38Kb<sup>Δ45/Δ45</sup> mutant muscle probed with anti-  
650 Lamin. **G)** Immunoblot analysis of p38Kb<sup>Ex41/Ex41</sup> control and p38Kb<sup>Δ45/Δ45</sup> mutant muscle  
651 lysates probed with anti-phospho Lamin and **H)** quantified using densitometry. **I)**  
652 Immunoblots of sucrose gradient fractions from 3 week old p38Kb<sup>Ex41/Ex41</sup> control and  
653 p38Kb<sup>Δ45/Δ45</sup> mutant muscle probed with anti-phospho-Lamin.

654

655 **Fig 6. p38Kb and stv physically interact with Lamin.**

656 **A)** Endogenous HspB8-GFP, Hsc70-GFP and stv-GFP-FLAG fusion proteins were  
657 immunoprecipitated from adult muscle lysate using anti-GFP coated beads.  
658 Immunoblots were probed with anti-Lamin and anti-GFP. **B)** A nls-GFP or Lamin-GFP  
659 was expressed in muscles using MHC-GAL4. GFP proteins were immunoprecipitated  
660 from adult muscle lysates using anti-GFP coated beads. Immunoblots were probed with  
661 anti-stv and anti-GFP. **C)** p38Kb<sup>KD</sup> was expressed in muscles using Mef2-GAL4. p38Kb  
662 was immunoprecipitated from adult muscle lysates using anti-FLAG coated beads.  
663 Immunoblots were probed with anti-lamin and anti-FLAG.

664

665 **Fig S1. CASA complex expression with age.** Immunoblot analysis of **A)** endogenously  
666 GFP tagged Hsc70-4, **B)** endogenously GFP tagged HspB8, **C)** stv, and **D)** the FLAG  
667 tagged p38Kb kinase dead transgene with age. Asterisks denote a p value of ≤0.05 as  
668 compared to the 3 day time point.

669

670 **Fig S2. Localization of HspB8 in p38Kb mutants.** Endogenously GFP-tagged HspB8  
671 was analyzed in the muscle of three week old **A)** controls and **B)** p38Kb mutants. HspB8

672 (green) localizes to the Z-disc and M-line of the indirect flight muscle (actin in magenta)  
673 in both control and p38Kb mutant animals.

674

675

## 676 **References**

- 677 1. Taylor, R. C. & Dillin, A. Aging as an event of proteostasis collapse. *Cold Spring*  
678 *Harb. Perspect. Biol.* **3**, (2011).
- 679 2. Ben-Zvi, A., Miller, E. A. & Morimoto, R. I. Collapse of proteostasis represents an  
680 early molecular event in *Caenorhabditis elegans* aging. *Proc. Natl. Acad. Sci. U. S.*  
681 *A.* **106**, 14914–14919 (2009).
- 682 3. Cohen, E., Bieschke, J., Perciavalle, R. M., Kelly, J. W. & Dillin, A. Opposing  
683 activities protect against age-onset proteotoxicity. *Science* **313**, 1604–1610 (2006).
- 684 4. Demontis, F. & Perrimon, N. FOXO/4E-BP signaling in *Drosophila* muscles regulates  
685 organism-wide proteostasis during aging. *Cell* **143**, 813–825 (2010).
- 686 5. Morley, J. F., Brignull, H. R., Weyers, J. J. & Morimoto, R. I. The threshold for  
687 polyglutamine-expansion protein aggregation and cellular toxicity is dynamic and  
688 influenced by aging in *Caenorhabditis elegans*. *Proc. Natl. Acad. Sci. U. S. A.* **99**,  
689 10417–10422 (2002).
- 690 6. Palazzolo, I. *et al.* Overexpression of IGF-1 in muscle attenuates disease in a mouse  
691 model of spinal and bulbar muscular atrophy. *Neuron* **63**, 316–328 (2009).
- 692 7. Schnöder, L. *et al.* Deficiency of Neuronal p38 $\alpha$  MAPK Attenuates Amyloid  
693 Pathology in Alzheimer Disease Mouse and Cell Models through Facilitating  
694 Lysosomal Degradation of BACE1. *J. Biol. Chem.* **291**, 2067–2079 (2016).
- 695 8. Webber, J. L. & Tooze, S. A. New insights into the function of Atg9. *FEBS Lett.* **584**,  
696 1319–1326 (2010).

- 697 9. Liu, B., Cheng, Y., Zhang, B., Bian, H. & Bao, J. Polygonatum cyrtoneura lectin  
698 induces apoptosis and autophagy in human melanoma A375 cells through a  
699 mitochondria-mediated ROS-p38-p53 pathway. *Cancer Lett.* **275**, 54–60 (2009).
- 700 10. Younce, C. W. & Kolattukudy, P. E. MCP-1 causes cardiomyoblast death via  
701 autophagy resulting from ER stress caused by oxidative stress generated by  
702 inducing a novel zinc-finger protein, MCP1P. *Biochem. J.* **426**, 43–53 (2010).
- 703 11. Duan, W.-J. *et al.* Silibinin activated p53 and induced autophagic death in human  
704 fibrosarcoma HT1080 cells via reactive oxygen species-p38 and c-Jun N-terminal  
705 kinase pathways. *Biol. Pharm. Bull.* **34**, 47–53 (2011).
- 706 12. Zhuang, Y., Li, Y., Li, X., Xie, Q. & Wu, M. Atg7 Knockdown Augments Concanavalin  
707 A-Induced Acute Hepatitis through an ROS-Mediated p38/MAPK Pathway. *PloS One*  
708 **11**, e0149754 (2016).
- 709 13. Henson, S. M. *et al.* p38 signaling inhibits mTORC1-independent autophagy in  
710 senescent human CD8<sup>+</sup> T cells. *J. Clin. Invest.* **124**, 4004–4016 (2014).
- 711 14. Luo, Y. *et al.* Autophagy regulates ROS-induced cellular senescence via p21 in a  
712 p38 MAPK $\alpha$  dependent manner. *Exp. Gerontol.* **46**, 860–867 (2011).
- 713 15. Rudolf, E., Rezáčová, K. & Cervinka, M. Activation of p38 and changes in  
714 mitochondria accompany autophagy to premature senescence-like phenotype switch  
715 upon chronic exposure to selenite in colon fibroblasts. *Toxicol. Lett.* **231**, 29–37  
716 (2014).
- 717 16. Vrailas-Mortimer, A. *et al.* A muscle-specific p38 MAPK/Mef2/MnSOD pathway  
718 regulates stress, motor function, and life span in *Drosophila*. *Dev. Cell* **21**, 783–795  
719 (2011).
- 720 17. Belozherov, V. E., Ratkovic, S., McNeill, H., Hilliker, A. J. & McDermott, J. C. In vivo  
721 interaction proteomics reveal a novel p38 mitogen-activated protein kinase/Rack1

- 722 pathway regulating proteostasis in Drosophila muscle. *Mol. Cell. Biol.* **34**, 474–484  
723 (2014).
- 724 18. Guruharsha, K. G. *et al.* A protein complex network of Drosophila melanogaster. *Cell*  
725 **147**, 690–703 (2011).
- 726 19. Arndt, V. *et al.* Chaperone-assisted selective autophagy is essential for muscle  
727 maintenance. *Curr. Biol. CB* **20**, 143–148 (2010).
- 728 20. Stürner, E. & Behl, C. The Role of the Multifunctional BAG3 Protein in Cellular  
729 Protein Quality Control and in Disease. *Front. Mol. Neurosci.* **10**, 177 (2017).
- 730 21. Behl, C. BAG3 and friends: co-chaperones in selective autophagy during aging and  
731 disease. *Autophagy* **7**, 795–798 (2011).
- 732 22. Gamerdinger, M. *et al.* Protein quality control during aging involves recruitment of  
733 the macroautophagy pathway by BAG3. *EMBO J.* **28**, 889–901 (2009).
- 734 23. Ketterer, N., Dreiseidler, M., Tawo, R. & Höfeld, J. Chaperone-assisted degradation:  
735 multiple paths to destruction. *Biol. Chem.* **391**, 481–489 (2010).
- 736 24. Min, J.-N. *et al.* CHIP deficiency decreases longevity, with accelerated aging  
737 phenotypes accompanied by altered protein quality control. *Mol. Cell. Biol.* **28**, 4018–  
738 4025 (2008).
- 739 25. Terman, A., Gustafsson, B. & Brunk, U. T. Autophagy, organelles and ageing. *J.*  
740 *Pathol.* **211**, 134–143 (2007).
- 741 26. Dietzl, G. *et al.* A genome-wide transgenic RNAi library for conditional gene  
742 inactivation in Drosophila. *Nature* **448**, 151–156 (2007).
- 743 27. R. C. Team. R Foundation for Statistical Computing. (2015).
- 744 28. Lim, K. L. *et al.* Parkin mediates nonclassical, proteasomal-independent  
745 ubiquitination of synphilin-1: implications for Lewy body formation. *J. Neurosci. Off.*  
746 *J. Soc. Neurosci.* **25**, 2002–2009 (2005).

- 747 29. Olzmann, J. A. *et al.* Parkin-mediated K63-linked polyubiquitination targets misfolded  
748 DJ-1 to aggresomes via binding to HDAC6. *J. Cell Biol.* **178**, 1025–1038 (2007).
- 749 30. Yung, C., Sha, D., Li, L. & Chin, L.-S. Parkin Protects Against Misfolded SOD1  
750 Toxicity by Promoting Its Aggresome Formation and Autophagic Clearance. *Mol.*  
751 *Neurobiol.* **53**, 6270–6287 (2016).
- 752 31. Hao, R. *et al.* Proteasomes activate aggresome disassembly and clearance by  
753 producing unanchored ubiquitin chains. *Mol. Cell* **51**, 819–828 (2013).
- 754 32. Tan, J. M. M. *et al.* Lysine 63-linked ubiquitination promotes the formation and  
755 autophagic clearance of protein inclusions associated with neurodegenerative  
756 diseases. *Hum. Mol. Genet.* **17**, 431–439 (2008).
- 757 33. Katsuragi, Y., Ichimura, Y. & Komatsu, M. p62/SQSTM1 functions as a signaling hub  
758 and an autophagy adaptor. *FEBS J.* **282**, 4672–4678 (2015).
- 759 34. Ulbricht, A. *et al.* Cellular mechanotransduction relies on tension-induced and  
760 chaperone-assisted autophagy. *Curr. Biol. CB* **23**, 430–435 (2013).
- 761 35. Hattori, A., Mizuno, T., Akamatsu, M., Hisamoto, N. & Matsumoto, K. The  
762 *Caenorhabditis elegans* JNK Signaling Pathway Activates Expression of Stress  
763 Response Genes by Derepressing the Fos/HDAC Repressor Complex. *PLOS*  
764 *Genet.* **9**, e1003315 (2013).
- 765 36. Coulson, M., Robert, S. & Saint, R. *Drosophila* starvin encodes a tissue-specific  
766 BAG-domain protein required for larval food uptake. *Genetics* **171**, 1799–1812  
767 (2005).
- 768 37. Sato, T. *et al.* DNAJB6 myopathy in an Asian cohort and cytoplasmic/nuclear  
769 inclusions. *Neuromuscul. Disord. NMD* **23**, 269–276 (2013).
- 770 38. Selcen, D. *et al.* Mutation in BAG3 causes severe dominant childhood muscular  
771 dystrophy. *Ann. Neurol.* **65**, 83–89 (2009).

- 772 39. Sarparanta, J. *et al.* Mutations affecting the cytoplasmic functions of the co-  
773 chaperone DNAJB6 cause limb-girdle muscular dystrophy. *Nat. Genet.* **44**, 450–455,  
774 S1-2 (2012).
- 775 40. Fanzani, A. *et al.* Hypertrophy and atrophy inversely regulate Caveolin-3 expression  
776 in myoblasts. *Biochem. Biophys. Res. Commun.* **357**, 314–318 (2007).
- 777 41. Capanni, C. *et al.* Dysferlin in a hyperCKaemic patient with caveolin 3 mutation and  
778 in C2C12 cells after p38 MAP kinase inhibition. *Exp. Mol. Med.* **35**, 538–544 (2003).
- 779 42. Suzuki, N. *et al.* Continuous administration of poloxamer 188 reduces overload-  
780 induced muscular atrophy in dysferlin-deficient SJL mice. *Neurosci. Res.* **72**, 181–  
781 186 (2012).
- 782 43. De Sandre-Giovannoli, A. *et al.* Lamin a truncation in Hutchinson-Gilford progeria.  
783 *Science* **300**, 2055 (2003).
- 784 44. Eriksson, M. *et al.* Recurrent de novo point mutations in lamin A cause Hutchinson-  
785 Gilford progeria syndrome. *Nature* **423**, 293–298 (2003).
- 786 45. Mounkes, L. C., Kozlov, S., Hernandez, L., Sullivan, T. & Stewart, C. L. A progeroid  
787 syndrome in mice is caused by defects in A-type lamins. *Nature* **423**, 298–301  
788 (2003).
- 789 46. Singla, A. *et al.* Lamin aggregation is an early sensor of porphyria-induced liver  
790 injury. *J. Cell Sci.* **126**, 3105–3112 (2013).
- 791 47. Bank, E. M. *et al.* A laminopathic mutation disrupting lamin filament assembly  
792 causes disease-like phenotypes in *Caenorhabditis elegans*. *Mol. Biol. Cell* **22**, 2716–  
793 2728 (2011).
- 794 48. Casasola, A. *et al.* Prelamin A processing, accumulation and distribution in normal  
795 cells and laminopathy disorders. *Nucleus* **7**, 84–102 (2016).
- 796 49. Dialynas, G. *et al.* Myopathic Lamin Mutations Cause Reductive Stress and Activate  
797 the Nrf2/Keap-1 Pathway. *PLOS Genet.* **11**, e1005231 (2015).

- 798 50. Hübner, S., Eam, J. E., Hübner, A. & Jans, D. A. Laminopathy-inducing lamin A  
799 mutants can induce redistribution of lamin binding proteins into nuclear aggregates.  
800 *Exp. Cell Res.* **312**, 171–183 (2006).
- 801 51. Hübner, S., Eam, J. E., Wagstaff, K. M. & Jans, D. A. Quantitative analysis of  
802 localization and nuclear aggregate formation induced by GFP-lamin A mutant  
803 proteins in living HeLa cells. *J. Cell. Biochem.* **98**, 810–826 (2006).
- 804 52. Ahmed, M. S., Ikram, S., Bibi, N. & Mir, A. Hutchinson-Gilford Progeria Syndrome: A  
805 Premature Aging Disease. *Mol. Neurobiol.* **55**, 4417–4427 (2018).
- 806 53. Barascu, A. *et al.* Oxidative stress induces an ATM-independent senescence  
807 pathway through p38 MAPK-mediated lamin B1 accumulation. *EMBO J.* **31**, 1080–  
808 1094 (2012).
- 809 54. Zaremba-Czogalla, M. *et al.* The Different Function of Single Phosphorylation Sites  
810 of *Drosophila melanogaster* Lamin Dm and Lamin C. *PLoS ONE* **7**, (2012).
- 811 55. Li, Y. *et al.* Lamin Mutations Accelerate Aging via Defective Export of Mitochondrial  
812 mRNAs through Nuclear Envelope Budding. *Curr. Biol. CB* **26**, 2052–2059 (2016).
- 813 56. Muñoz-Alarcón, A. *et al.* Characterization of lamin Mutation Phenotypes in  
814 *Drosophila* and Comparison to Human Laminopathies. *PLOS ONE* **2**, e532 (2007).
- 815 57. Kitten, G. T. & Nigg, E. A. The CaaX motif is required for isoprenylation, carboxyl  
816 methylation, and nuclear membrane association of lamin B2. *J. Cell Biol.* **113**, 13–23  
817 (1991).
- 818 58. Holtz, D., Tanaka, R. A., Hartwig, J. & McKeon, F. The CaaX motif of lamin A  
819 functions in conjunction with the nuclear localization signal to target assembly to the  
820 nuclear envelope. *Cell* **59**, 969–977 (1989).
- 821 59. Meshorer, E. & Gruenbaum, Y. Gone with the Wnt/Notch: stem cells in  
822 laminopathies, progeria, and aging. *J. Cell Biol.* **181**, 9–13 (2008).



- 823 60. Polychronidou, M., Hellwig, A. & Grosshans, J. Farnesylated nuclear proteins  
824 Kugelkern and lamin Dm0 affect nuclear morphology by directly interacting with the  
825 nuclear membrane. *Mol. Biol. Cell* **21**, 3409–3420 (2010).
- 826 61. Patterson, K. *et al.* The functions of Klarsicht and nuclear lamin in developmentally  
827 regulated nuclear migrations of photoreceptor cells in the *Drosophila* eye. *Mol. Biol.*  
828 *Cell* **15**, 600–610 (2004).
- 829 62. Cao, K., Capell, B. C., Erdos, M. R., Djabali, K. & Collins, F. S. A lamin A protein  
830 isoform overexpressed in Hutchinson-Gilford progeria syndrome interferes with  
831 mitosis in progeria and normal cells. *Proc. Natl. Acad. Sci. U. S. A.* **104**, 4949–4954  
832 (2007).
- 833 63. Machowska, M., Piekarowicz, K. & Rzepecki, R. Regulation of lamin properties and  
834 functions: does phosphorylation do it all? *Open Biol.* **5**, (2015).
- 835 64. Saito, A., Kawai, K., Takayama, H., Sudo, T. & Osada, H. Improvement of  
836 photoaffinity SPR imaging platform and determination of the binding site of  
837 p62/SQSTM1 to p38 MAP kinase. *Chem. Asian J.* **3**, 1607–1612 (2008).
- 838 65. Rana, A., Rera, M. & Walker, D. W. Parkin overexpression during aging reduces  
839 proteotoxicity, alters mitochondrial dynamics, and extends lifespan. *Proc. Natl. Acad.*  
840 *Sci. U. S. A.* **110**, 8638–8643 (2013).
- 841 66. Burke, B. & Stewart, C. L. The nuclear lamins: flexibility in function. *Nat. Rev. Mol.*  
842 *Cell Biol.* **14**, 13–24 (2013).

843

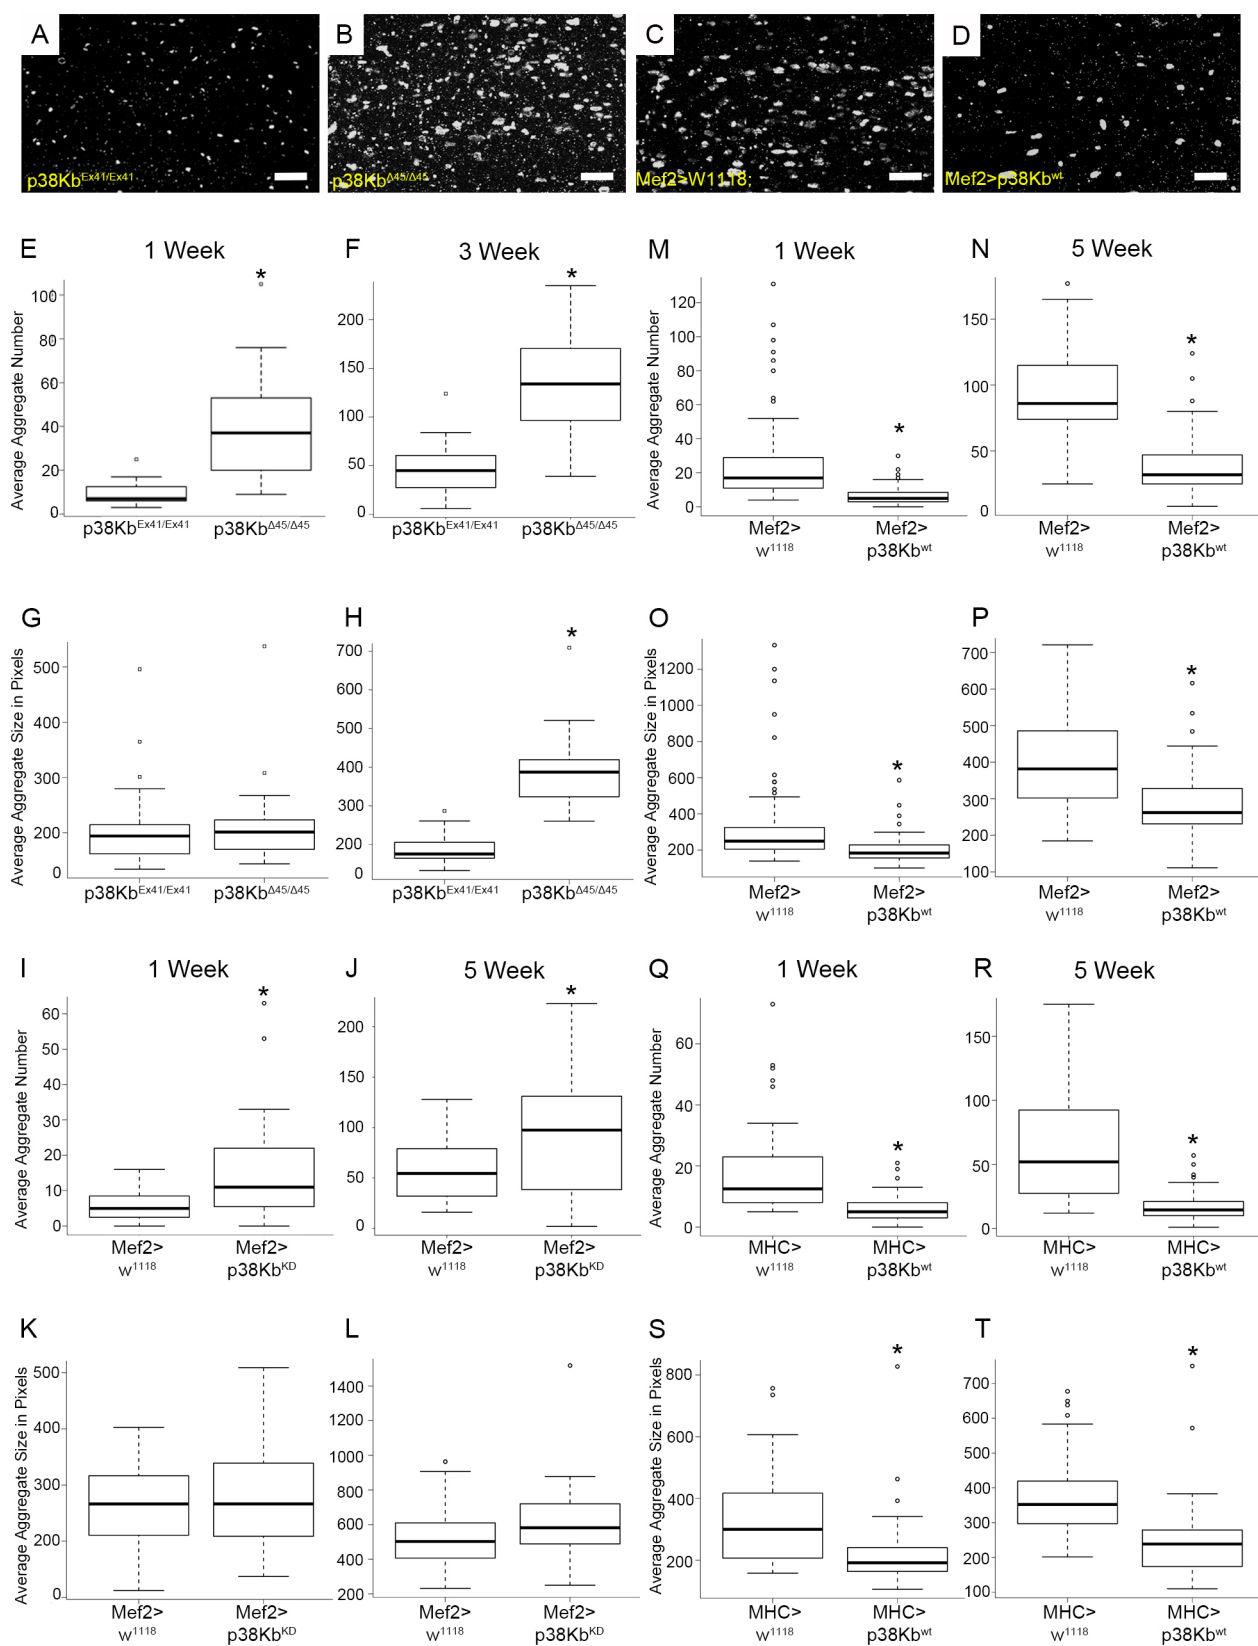

Figure 1

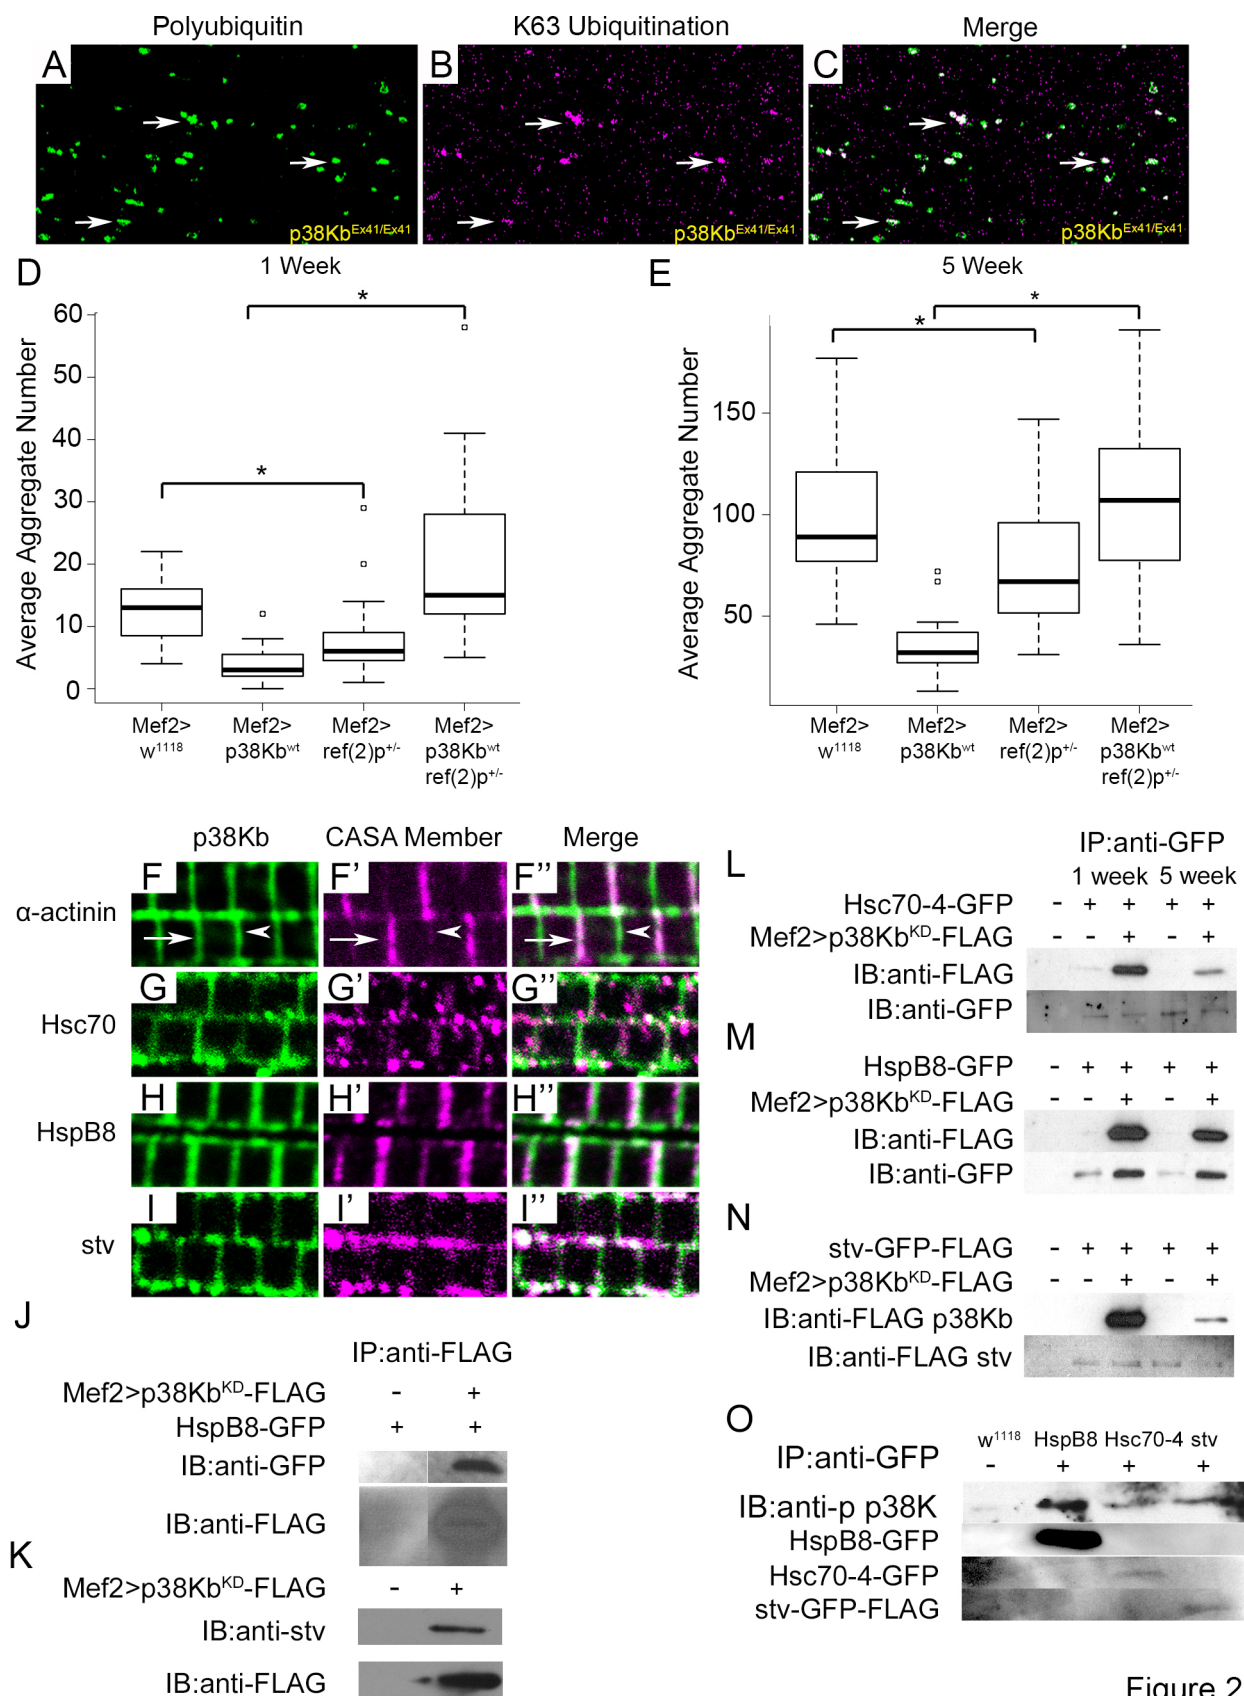

Figure 2

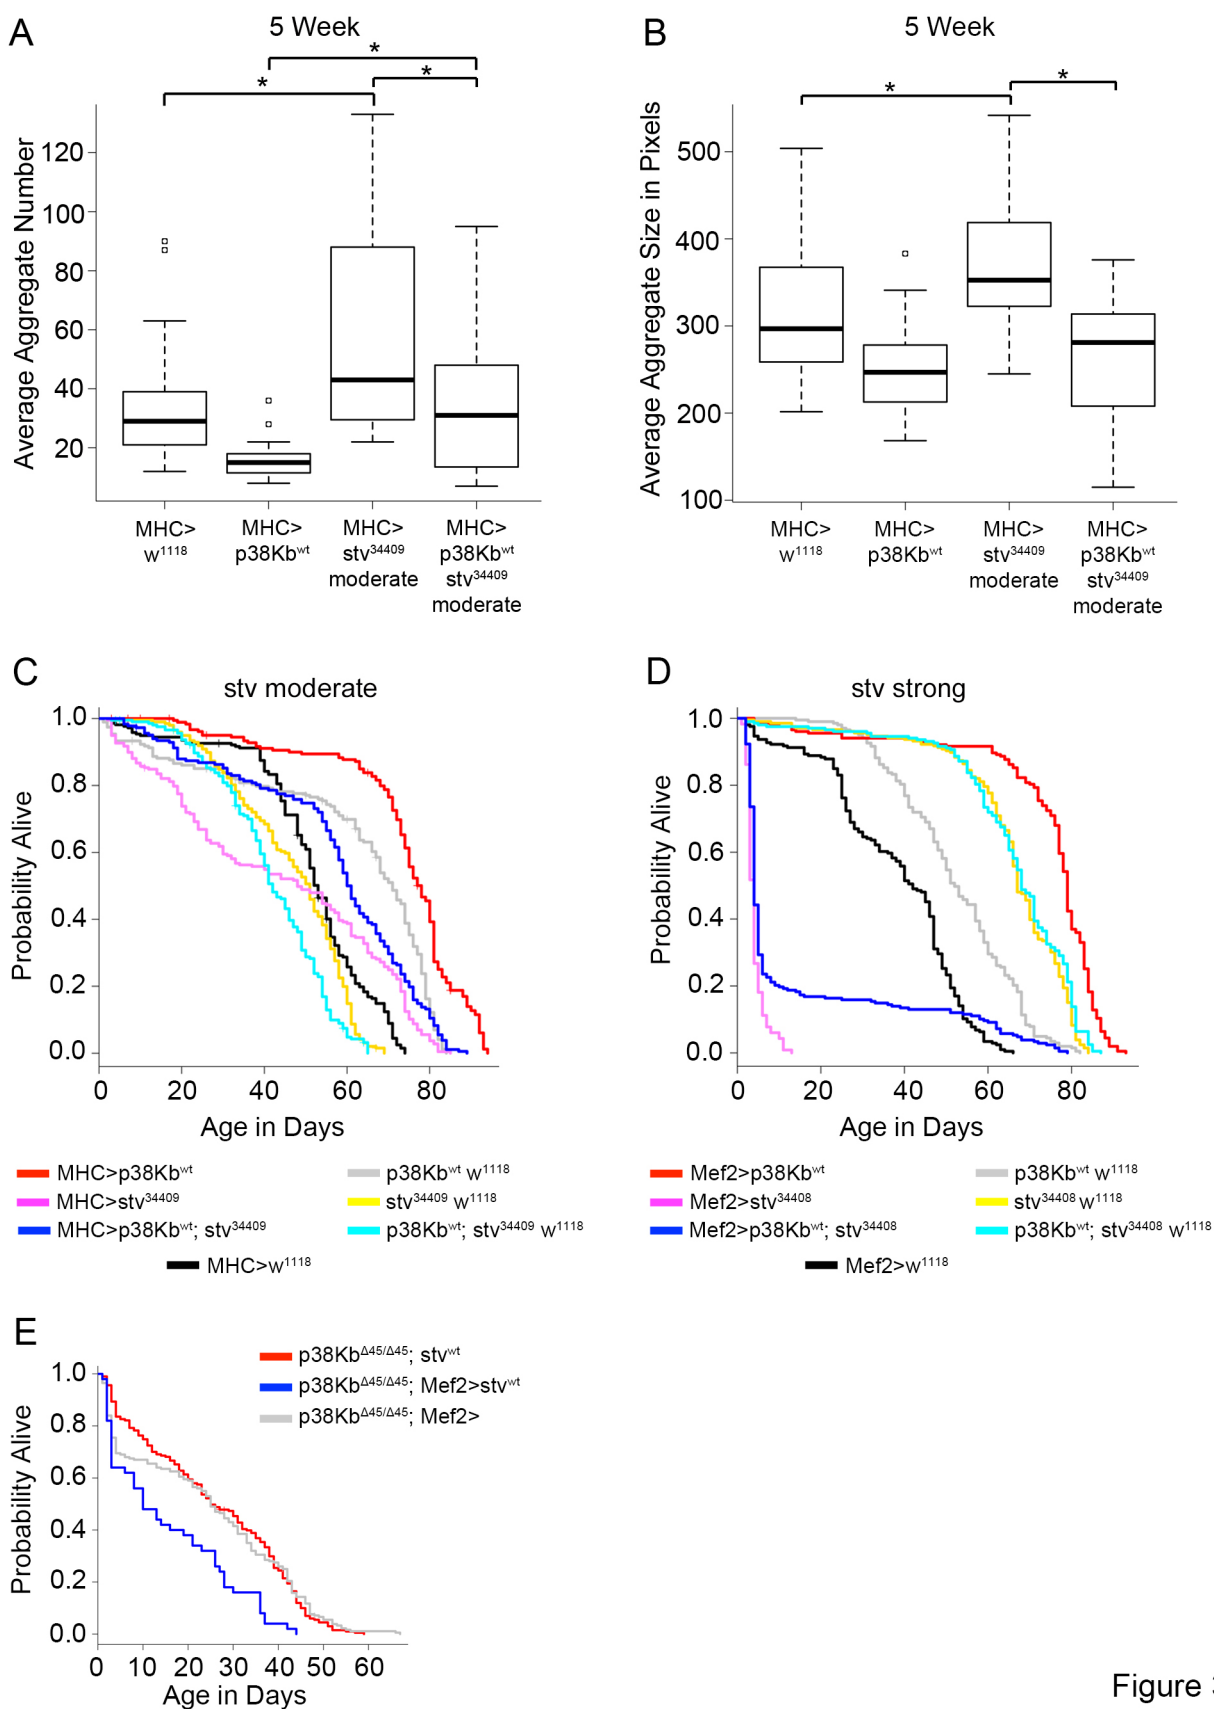

Figure 3

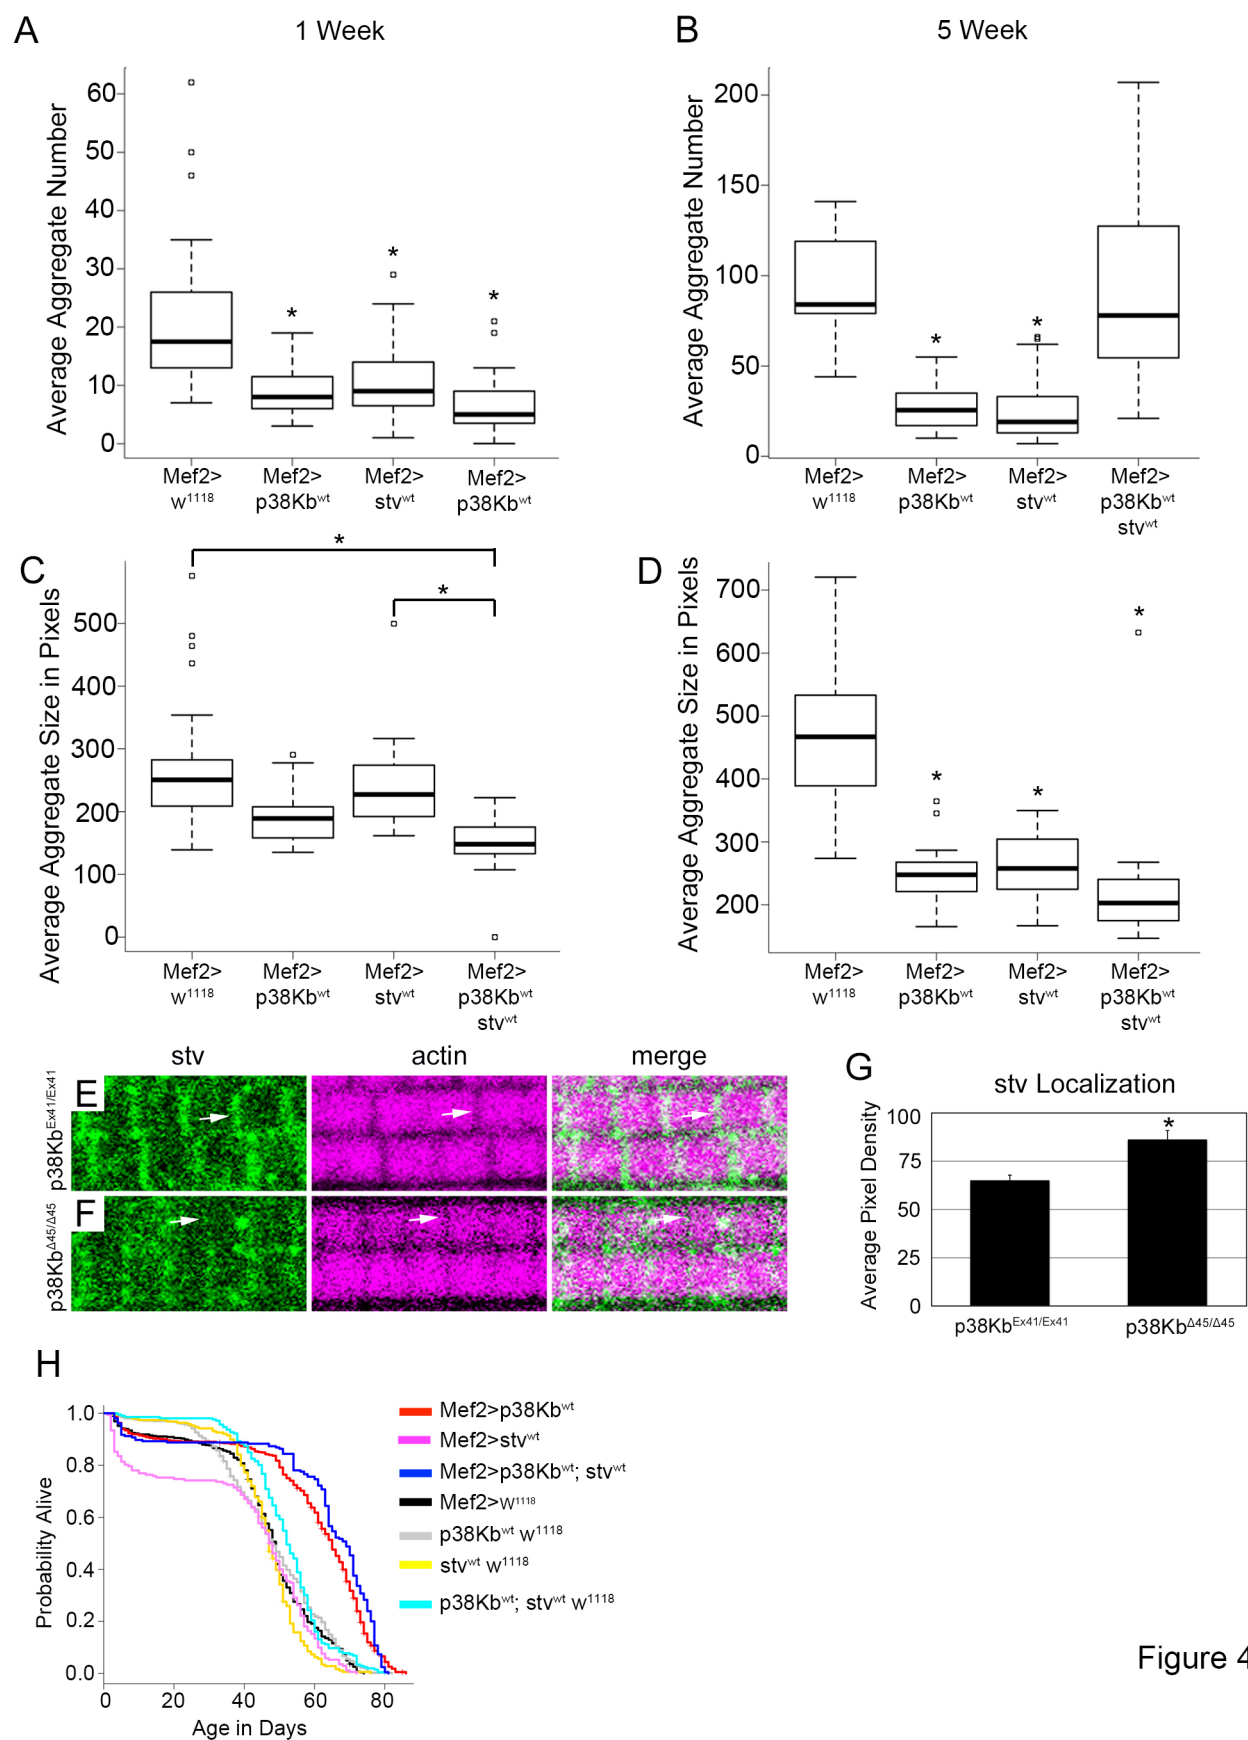

Figure 4

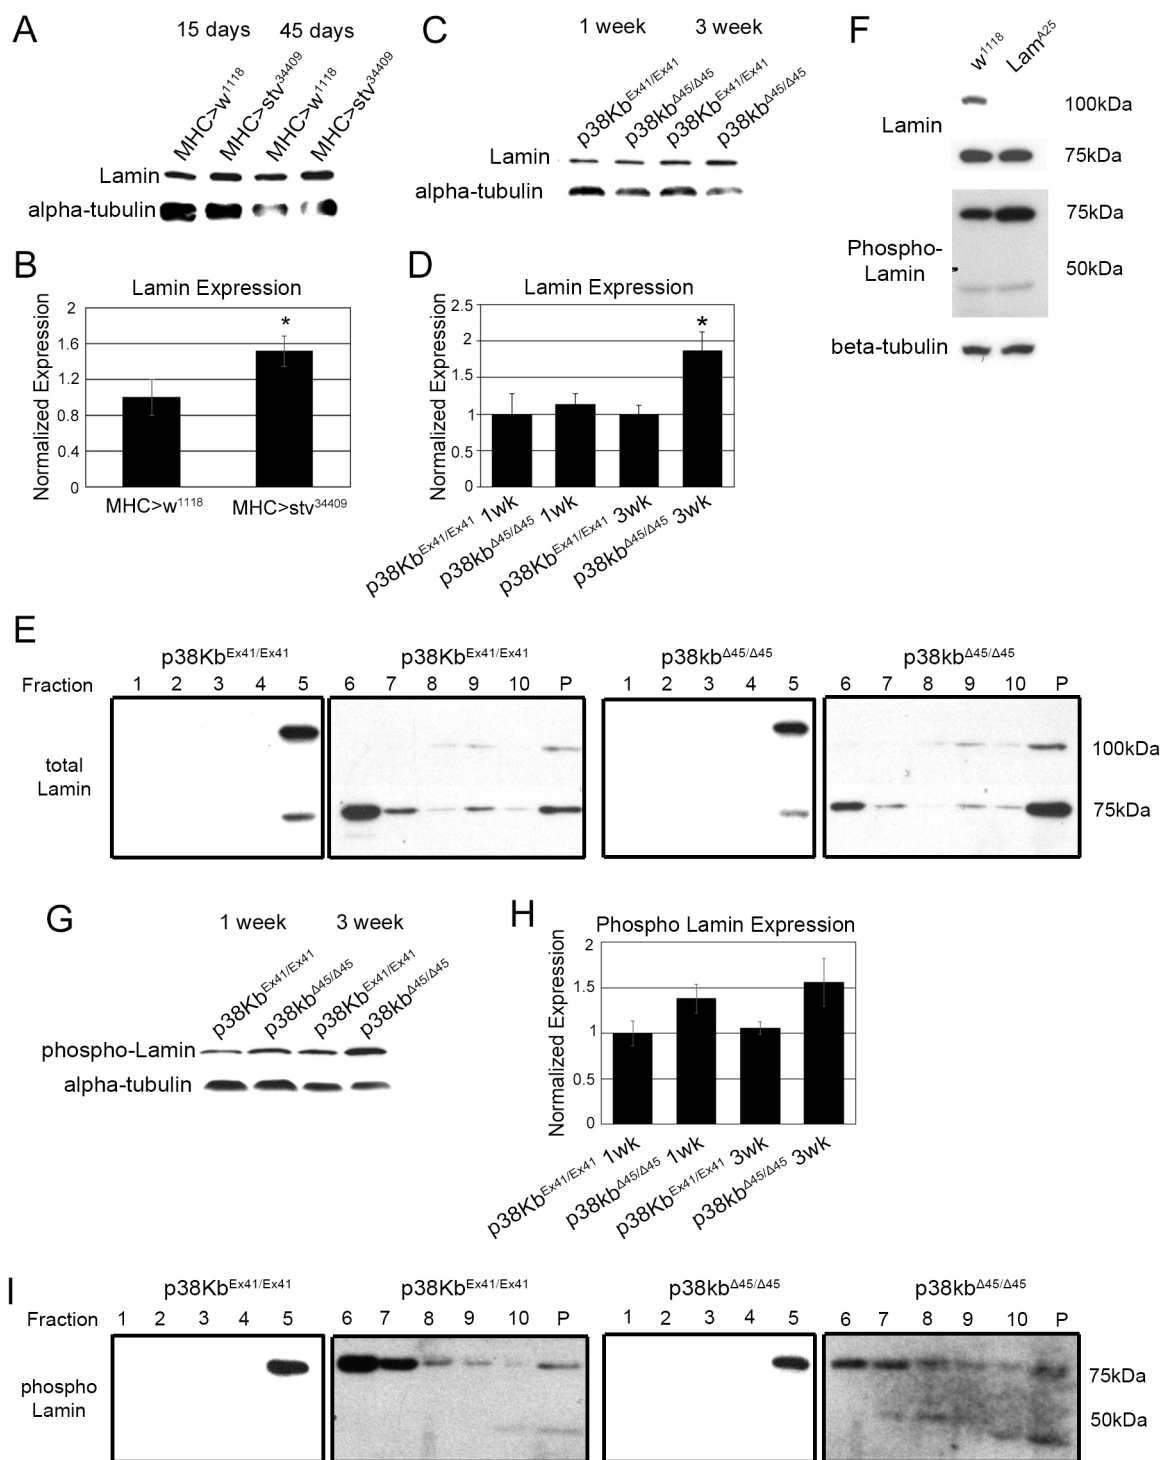

Figure 5



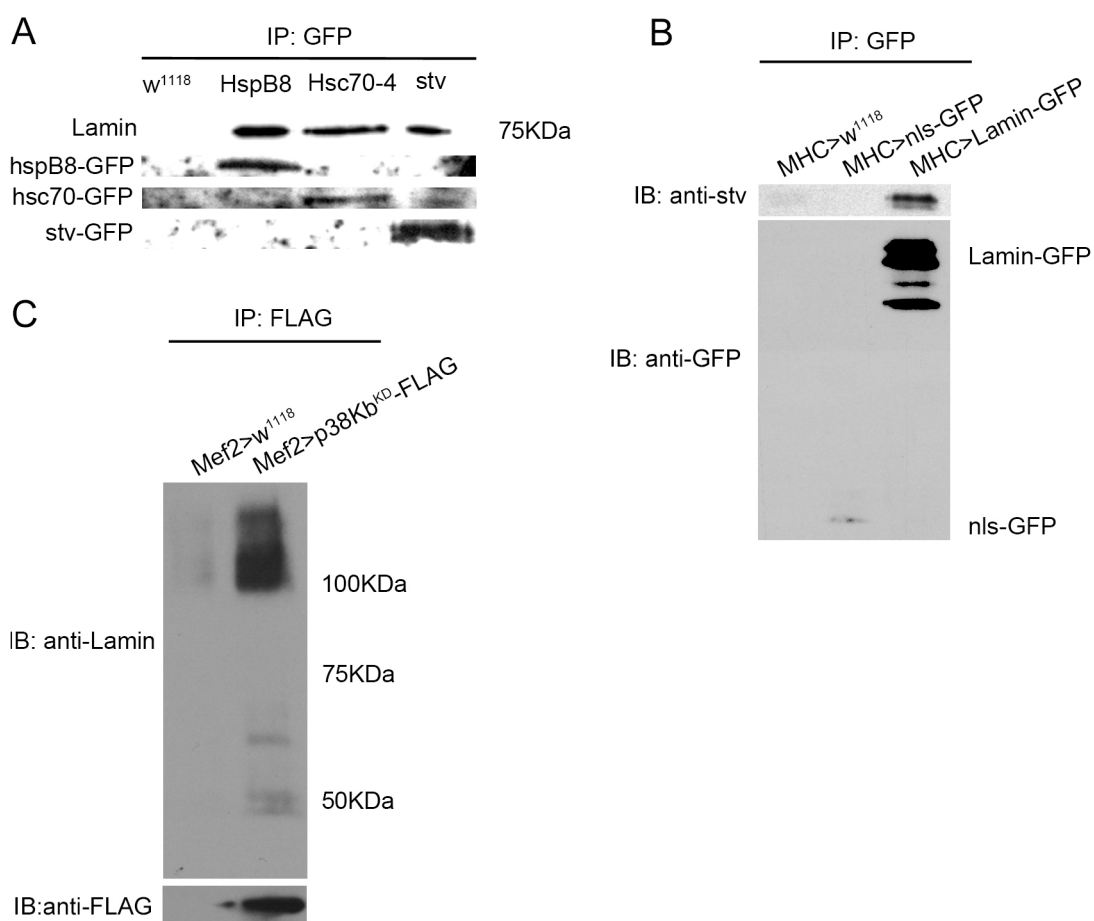

Figure 6
